# Supplementary material
Source: PubMed Central journal article supplement (PMC10164693)
Supplement: NIHMS1871711-supplement-1.pdf [file NIHMS1871711-supplement-1.pdf]

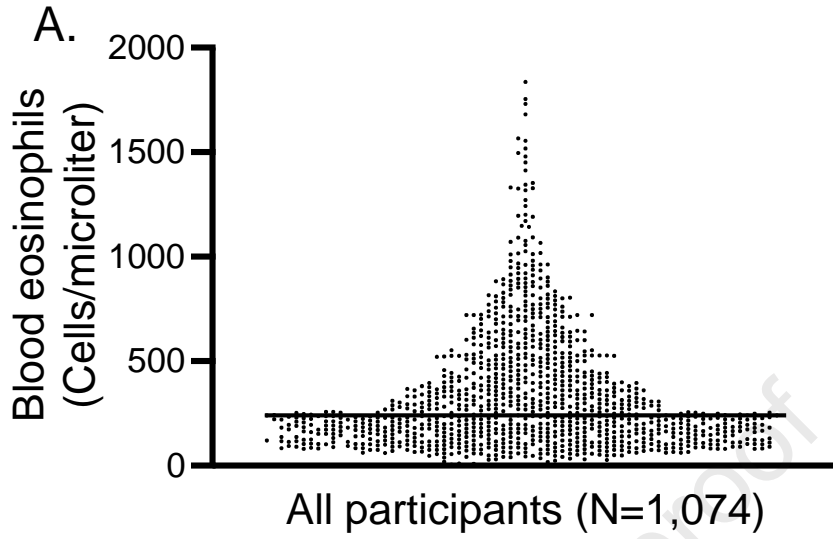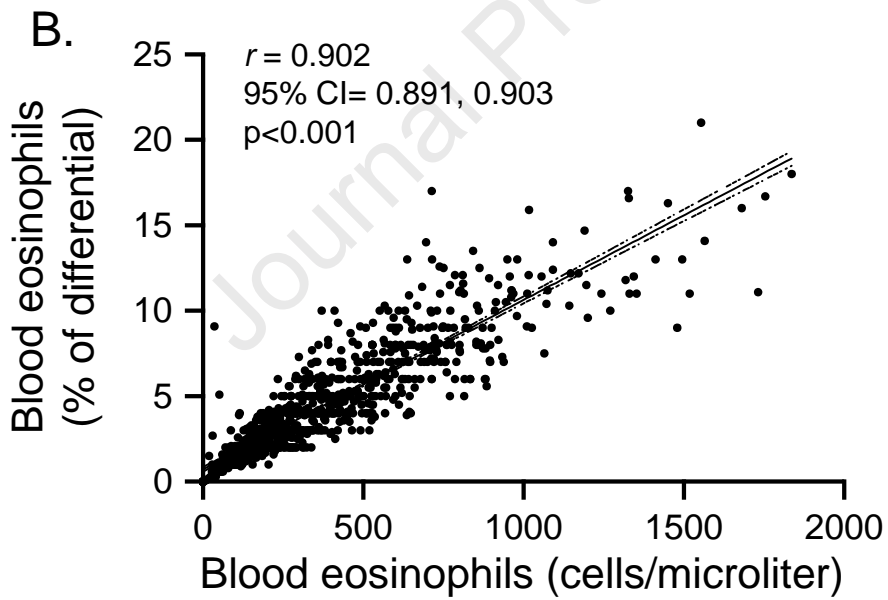

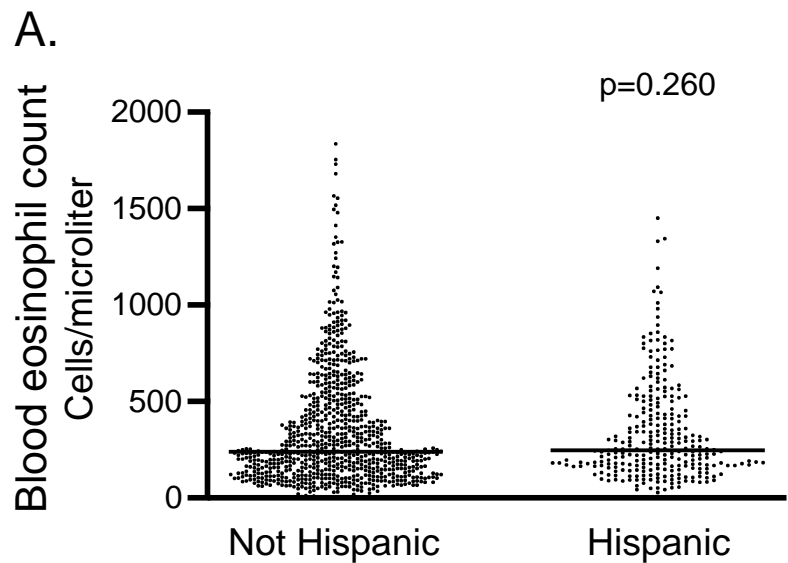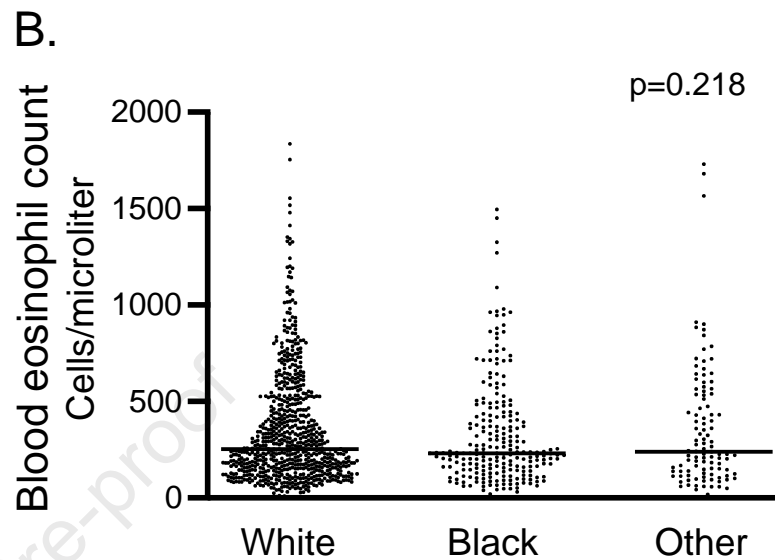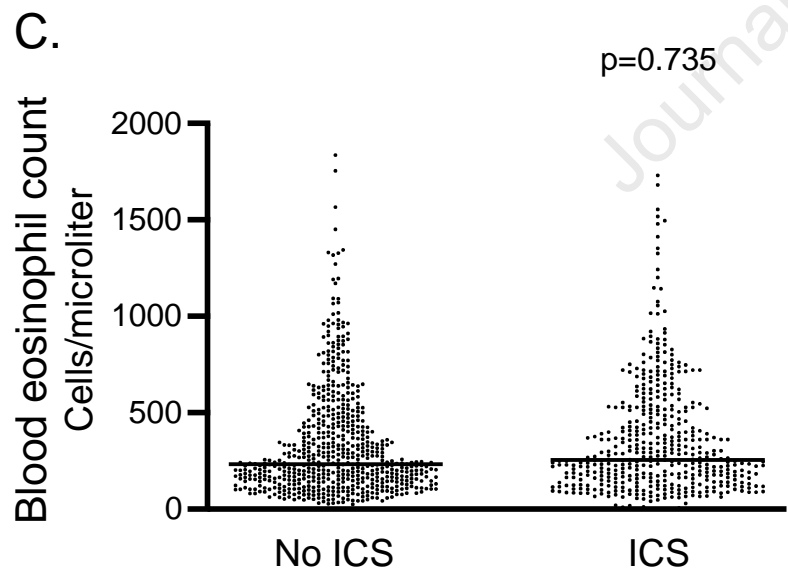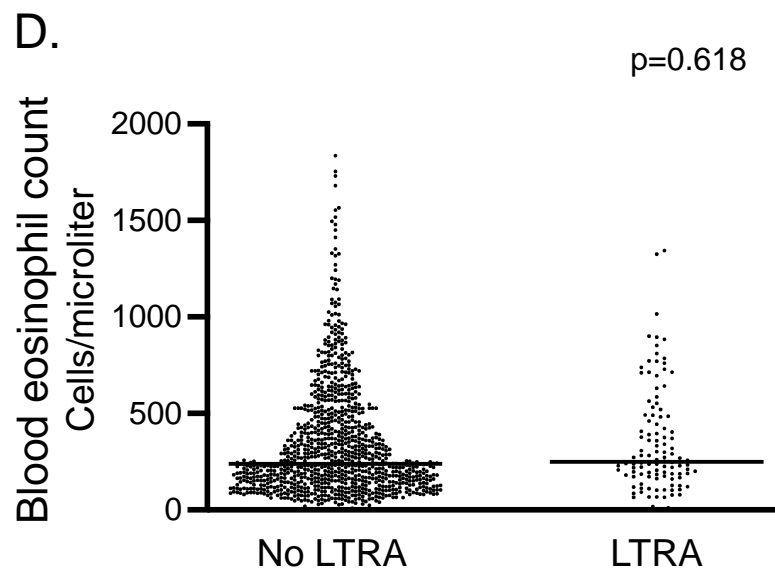

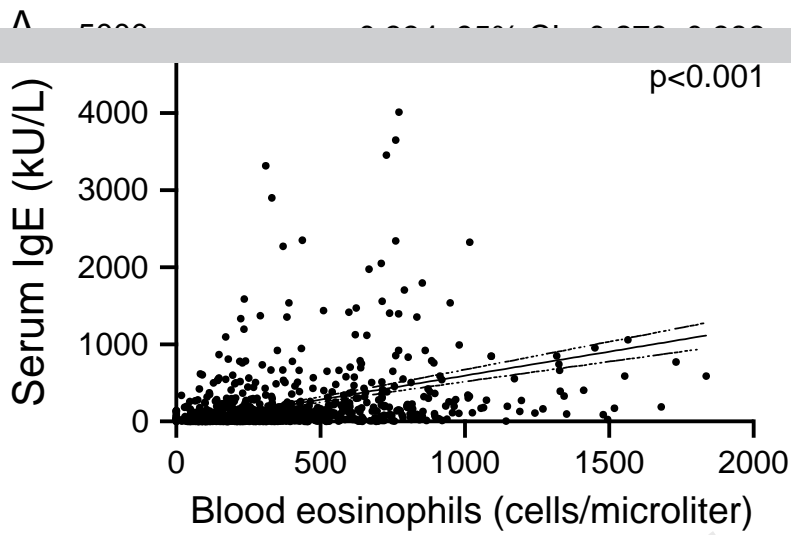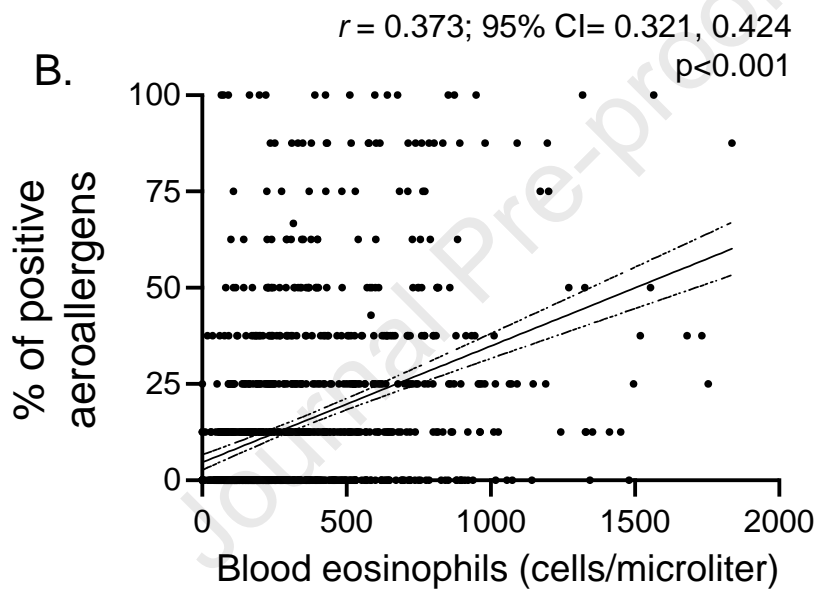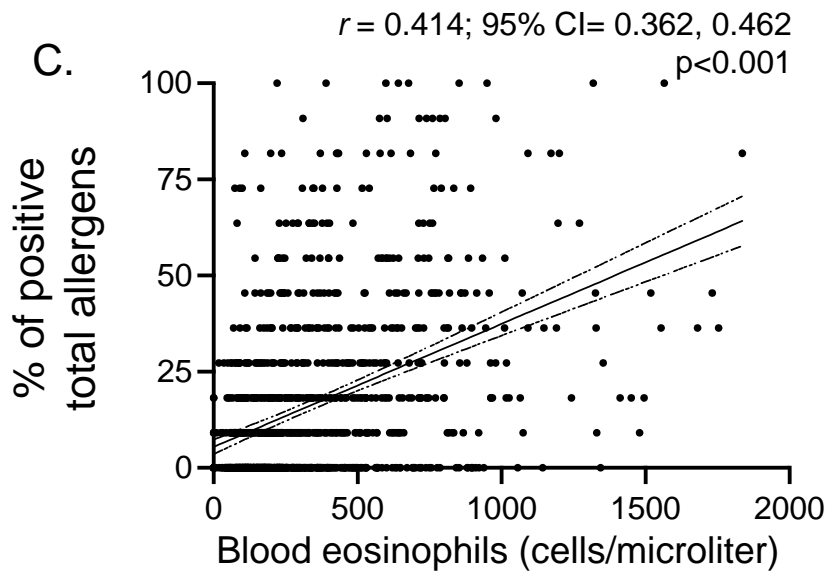

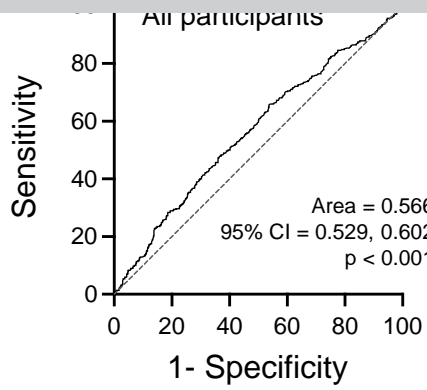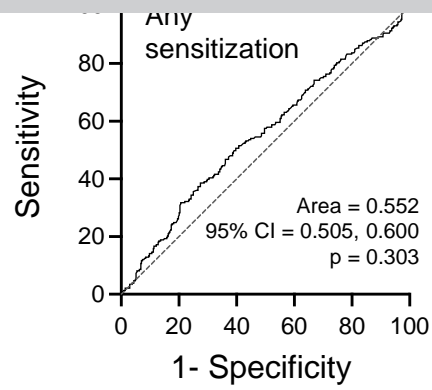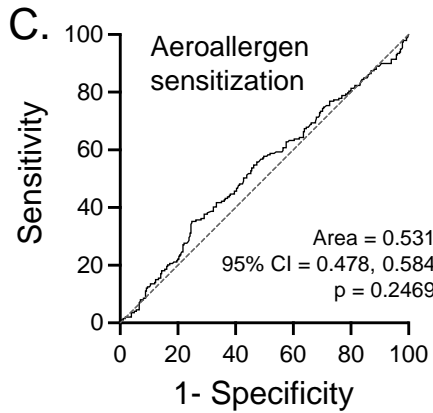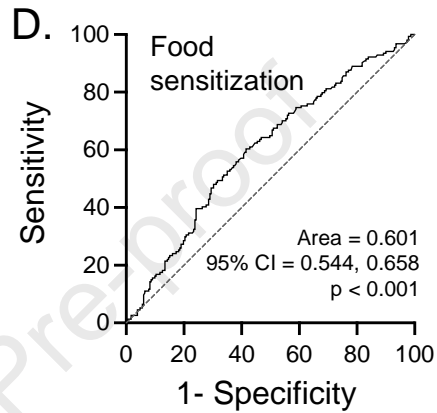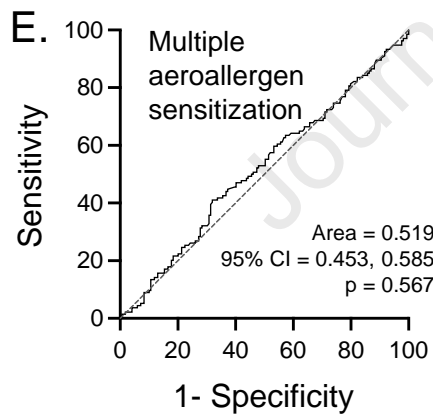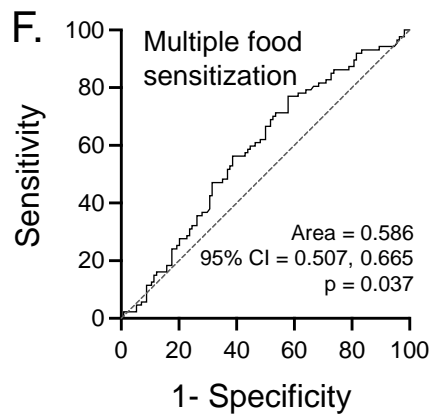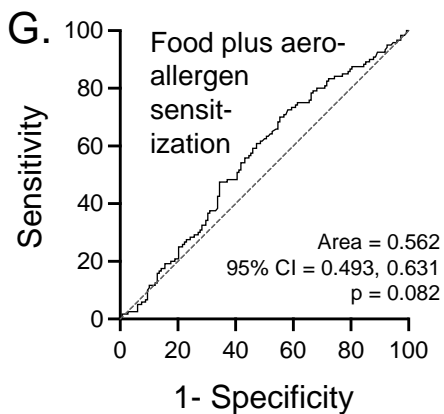

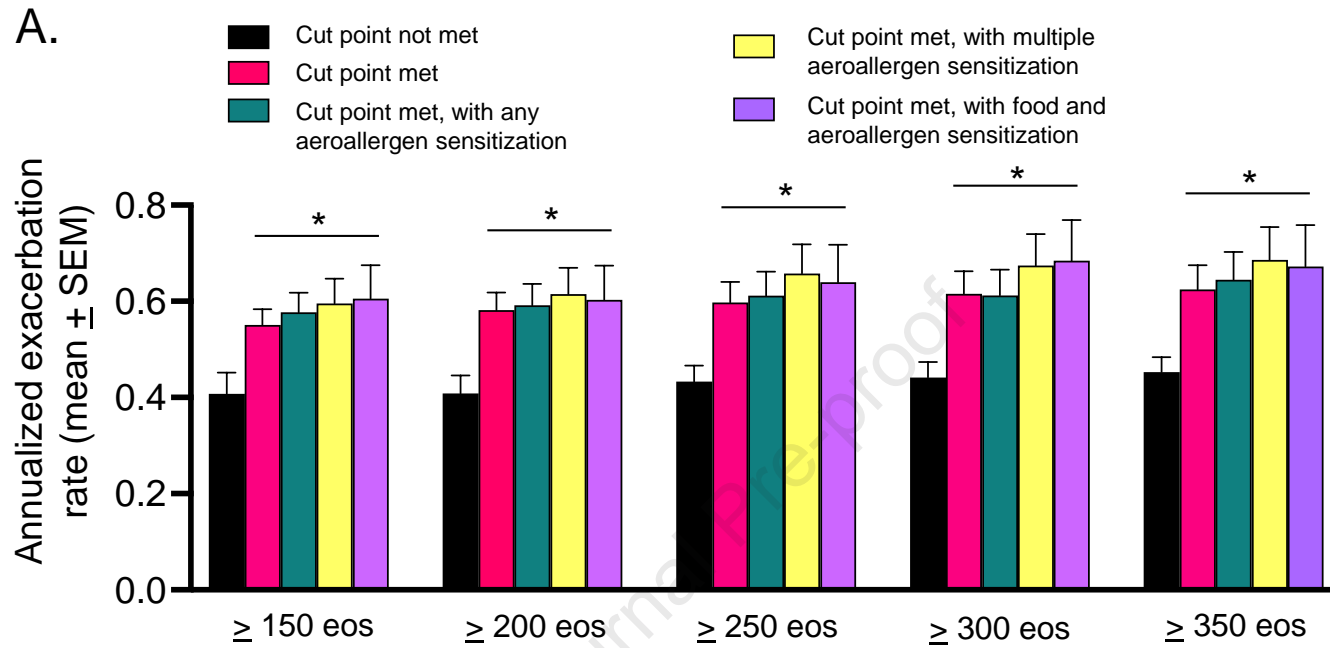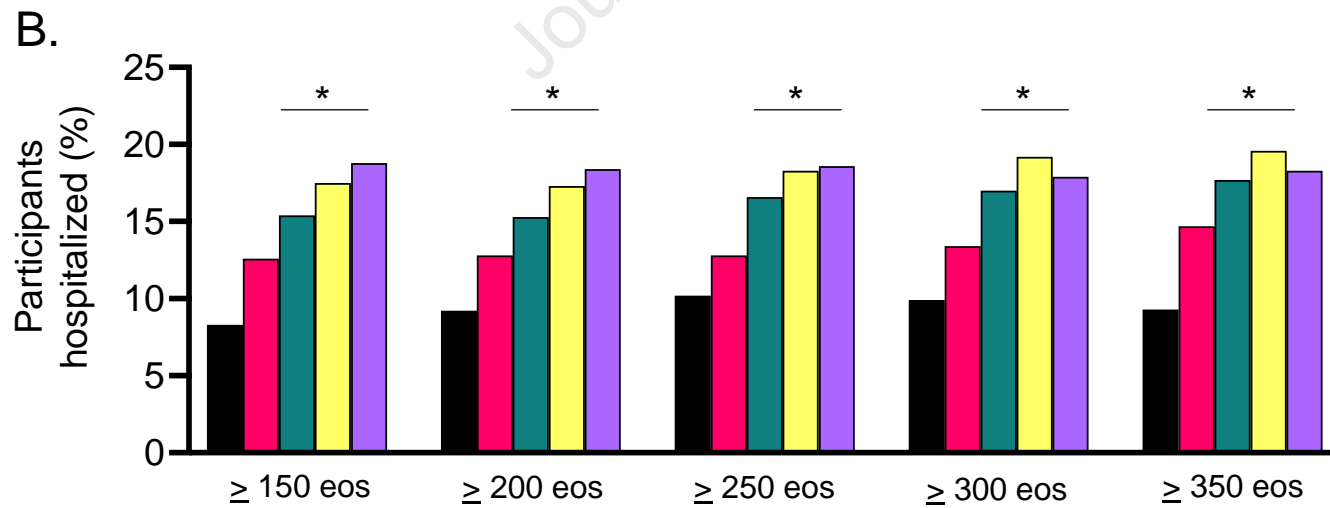

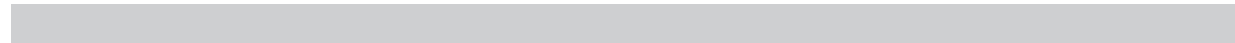

1 **Blood eosinophils for prediction of exacerbation in preschool children with recurrent wheezing**

2 Online Data Repository

3

4 Anne M. Fitzpatrick, Ph.D.<sup>1,2</sup>

5 Jocelyn R. Grunwell, M.D., Ph.D.<sup>1,3</sup>

6 Kirsten A. Cottrill, Ph.D.<sup>1</sup>

7 Abby D. Mutic, Ph.D.<sup>4</sup>

8 David T. Mauger, Ph.D.<sup>5</sup>

9

10 <sup>1</sup> Emory University, Department of Pediatrics, Atlanta, GA

11 <sup>2</sup> Children's Healthcare of Atlanta, Division of Pulmonary Medicine, Atlanta, GA

12 <sup>3</sup> Children's Healthcare of Atlanta, Division of Critical Care Medicine, Atlanta, GA

13 <sup>4</sup> Nell Hodgson Woodruff School of Nursing, Emory University, Atlanta, GA

14 <sup>5</sup> Pennsylvania State University, Department of Statistics, Hershey, PA

15

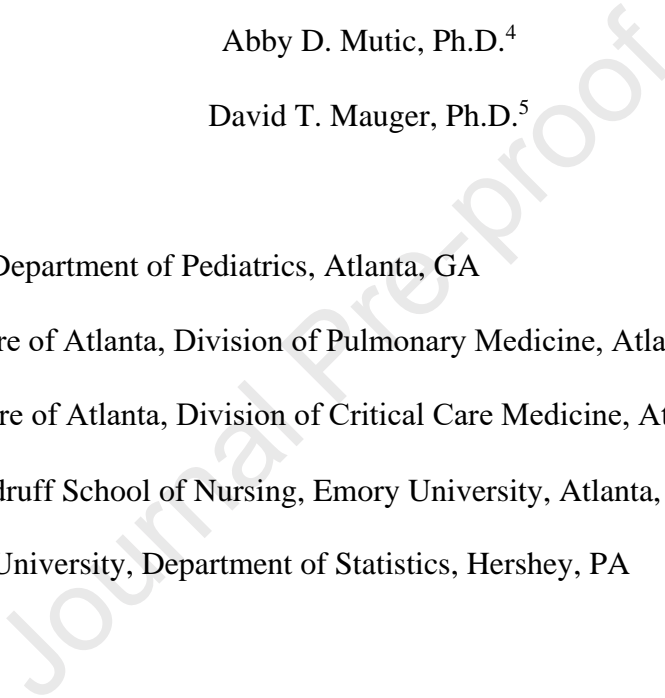

16 **Table E1.** Features of the included studies.

| Study feature                            | AIMS                                                                             | MIST                                                                                                                       | APRIL                                                         |
|------------------------------------------|----------------------------------------------------------------------------------|----------------------------------------------------------------------------------------------------------------------------|---------------------------------------------------------------|
| Years conducted                          | 2004                                                                             | 2008-2010                                                                                                                  | 2011-2015                                                     |
| Participants enrolled                    | 238                                                                              | 278                                                                                                                        | 607                                                           |
| Age of participants                      | 12-59 months                                                                     | 12-53 months                                                                                                               | 12-71 months                                                  |
| Additional requirements in the past year | ≥2 clinically significant wheezing exacerbations <sup>1</sup>                    | ≥1 clinically significant wheezing exacerbation <sup>1</sup> with a positive modified Asthma Predictive Index <sup>2</sup> | ≥2 clinically significant wheezing exacerbations <sup>1</sup> |
| Study design                             | Parallel arm                                                                     | Parallel arm                                                                                                               | Parallel arm                                                  |
| Run-in period                            | 2 weeks                                                                          | 2 weeks                                                                                                                    | 2-4 weeks                                                     |
| Run-in medication                        | No medication                                                                    | Placebo                                                                                                                    | No medication                                                 |
| Treatment arm duration                   | 52 weeks                                                                         | 52 weeks                                                                                                                   | 52-78 weeks                                                   |
| Treatment arm interventions              | Intermittent ICS, intermittent LTRA, versus placebo during respiratory illnesses | Daily ICS versus intermittent ICS during respiratory illnesses                                                             | Azithromycin versus placebo during respiratory illnesses      |

17

18 ICS=inhaled corticosteroid, LTRA=leukotriene receptor antagonist

19

20 <sup>1</sup> Defined as a wheezing episode necessitating an urgent care visit, hospitalization, or systemic corticosteroids

21 <sup>2</sup> Defined as frequent wheezing (at least 4 episodes in the previous year) and either 1 major risk factor (parental history of asthma, personal history of atopic dermatitis, or aeroallergen sensitization) or 2 of 3 minor risk factors (peripheral blood eosinophilia ≥4%, wheezing without colds, or allergic sensitization to foods)

22

23

24 **Table E2.** Associations between combined blood eosinophil and sensitization predictors and  
 25 exacerbation occurrence (primary outcome) with further adjustment for an exacerbation treated  
 26 with oral corticosteroids in the previous year.

| Model                                                                  | Adjusted odds ratio <sup>1</sup><br>(95% CI) | Change in<br>odds ratio |
|------------------------------------------------------------------------|----------------------------------------------|-------------------------|
| <b>Blood eosinophils <math>\geq 150</math> cells/microliter, plus:</b> | 1.33 (0.98, 1.80)                            | --                      |
| Any food or aeroallergen sensitization                                 | 1.54 (1.18, 2.02)                            | 13.6%                   |
| Any aeroallergen sensitization                                         | 1.56 (1.19, 2.05)                            | 14.7%                   |
| Any food sensitization                                                 | 1.60 (1.21, 2.11)                            | 16.9%                   |
| Multiple aeroallergen sensitization                                    | 1.81 (1.34, 2.44)                            | 26.5%                   |
| Multiple food sensitization                                            | 1.81 (1.29, 2.54)                            | 26.5%                   |
| Food and aeroallergen sensitization                                    | 1.71 (1.27, 2.32)                            | 22.2%                   |
| <b>Blood eosinophils <math>\geq 200</math> cells/microliter, plus:</b> | 1.50 (1.14, 1.97)                            | --                      |
| Any food or aeroallergen sensitization                                 | 1.54 (1.18, 2.02)                            | 2.6%                    |
| Any aeroallergen sensitization                                         | 1.57 (1.19, 2.07)                            | 4.5%                    |
| Any food sensitization                                                 | 1.66 (1.25, 2.21)                            | 9.6%                    |
| Multiple aeroallergen sensitization                                    | 1.80 (1.33, 2.45)                            | 16.7%                   |
| Multiple food sensitization                                            | 1.81 (1.28, 2.56)                            | 17.1%                   |
| Food and aeroallergen sensitization                                    | 1.78 (1.31, 2.43)                            | 15.7%                   |
| <b>Blood eosinophils <math>\geq 250</math> cells/microliter, plus:</b> | 1.39 (1.07, 1.81)                            | --                      |
| Any food or aeroallergen sensitization                                 | 1.55 (1.17, 2.04)                            | 10.3%                   |
| Any aeroallergen sensitization                                         | 1.59 (1.19, 2.12)                            | 12.6%                   |
| Any food sensitization                                                 | 1.86 (1.38, 2.52)                            | 25.3%                   |
| Multiple aeroallergen sensitization                                    | 1.78 (1.29, 2.46)                            | 21.9%                   |
| Multiple food sensitization                                            | 1.99 (1.38, 2.86)                            | 30.2%                   |
| Food and aeroallergen sensitization                                    | 2.02 (1.47, 2.79)                            | 31.2%                   |
| <b>Blood eosinophils <math>\geq 300</math> cells/microliter, plus:</b> | 1.48 (1.13, 1.93)                            | --                      |
| Any food or aeroallergen sensitization                                 | 1.56 (1.17, 2.08)                            | 5.1%                    |
| Any aeroallergen sensitization                                         | 1.62 (1.21, 2.17)                            | 8.6%                    |
| Any food sensitization                                                 | 1.93 (1.41, 2.64)                            | 23.3%                   |
| Multiple aeroallergen sensitization                                    | 1.81 (1.30, 2.51)                            | 18.2%                   |
| Multiple food sensitization                                            | 2.21 (1.51, 3.22)                            | 33.0%                   |
| Food and aeroallergen sensitization                                    | 2.09 (1.50, 2.91)                            | 29.2%                   |
| <b>Blood eosinophils <math>\geq 350</math> cells/microliter, plus:</b> | 1.45 (1.11, 1.90)                            | --                      |
| Any food or aeroallergen sensitization                                 | 1.71 (1.27, 2.29)                            | 15.2%                   |
| Any aeroallergen sensitization                                         | 1.76 (1.30, 2.39)                            | 17.6%                   |
| Any food sensitization                                                 | 1.98 (1.43, 2.73)                            | 26.8%                   |



|                                     |                   |       |
|-------------------------------------|-------------------|-------|
| Multiple aeroallergen sensitization | 1.98 (1.40, 2.78) | 26.8% |
| Multiple food sensitization         | 2.14 (1.44, 3.18) | 32.2% |
| Food and aeroallergen sensitization | 2.12 (1.51, 2.98) | 31.6% |

27

28 CI = confidence interval

29

30 <sup>1</sup> Adjusted for daily inhaled corticosteroid treatment, intermittent inhaled corticosteroid  
31 treatment, sex, age group (<3 years versus ≥3 years), tobacco smoke exposure, and an  
32 exacerbation treated with oral corticosteroids in the previous year

33

34

Journal Pre-proof

35 **Table E3.** Receiver operating curve analyses depicting the sensitivity and specificity of blood  
 36 eosinophil cut points plus sensitization variables for the prediction of exacerbation occurrence.

| Model                                                                  | Sensitivity | Specificity |
|------------------------------------------------------------------------|-------------|-------------|
| <b>Blood eosinophils <math>\geq 150</math> cells/microliter, plus:</b> |             |             |
| Any food or aeroallergen sensitization                                 | 0.837       | 0.193       |
| Any aeroallergen sensitization                                         | 0.849       | 0.144       |
| Any food sensitization                                                 | 0.890       | 0.182       |
| Multiple aeroallergen sensitization                                    | 0.896       | 0.095       |
| Multiple food sensitization                                            | 0.920       | 0.167       |
| Food and aeroallergen sensitization                                    | 0.925       | 0.081       |
| <b>Blood eosinophils <math>\geq 200</math> cells/microliter, plus:</b> |             |             |
| Any food or aeroallergen sensitization                                 | 0.755       | 0.296       |
| Any aeroallergen sensitization                                         | 0.779       | 0.239       |
| Any food sensitization                                                 | 0.825       | 0.273       |
| Multiple aeroallergen sensitization                                    | 0.836       | 0.160       |
| Multiple food sensitization                                            | 0.874       | 0.211       |
| Food and aeroallergen sensitization                                    | 0.883       | 0.155       |
| <b>Blood eosinophils <math>\geq 250</math> cells/microliter, plus:</b> |             |             |
| Any food or aeroallergen sensitization                                 | 0.652       | 0.408       |
| Any aeroallergen sensitization                                         | 0.683       | 0.344       |
| Any food sensitization                                                 | 0.747       | 0.403       |
| Multiple aeroallergen sensitization                                    | 0.731       | 0.260       |
| Multiple food sensitization                                            | 0.805       | 0.325       |
| Food and aeroallergen sensitization                                    | 0.833       | 0.264       |
| <b>Blood eosinophils <math>\geq 300</math> cells/microliter, plus:</b> |             |             |
| Any food or aeroallergen sensitization                                 | 0.579       | 0.484       |
| Any aeroallergen sensitization                                         | 0.633       | 0.404       |
| Any food sensitization                                                 | 0.675       | 0.485       |
| Multiple aeroallergen sensitization                                    | 0.687       | 0.325       |
| Multiple food sensitization                                            | 0.770       | 0.421       |
| Food and aeroallergen sensitization                                    | 0.792       | 0.324       |
| <b>Blood eosinophils <math>\geq 350</math> cells/microliter, plus:</b> |             |             |
| Any food or aeroallergen sensitization                                 | 0.532       | 0.568       |
| Any aeroallergen sensitization                                         | 0.578       | 0.502       |
| Any food sensitization                                                 | 0.630       | 0.545       |
| Multiple aeroallergen sensitization                                    | 0.634       | 0.426       |
| Multiple food sensitization                                            | 0.690       | 0.482       |
| Food and aeroallergen sensitization                                    | 0.733       | 0.405       |

38 **Table E4.** Caregiver reported asthma control scores (mean  $\pm$  SEM) and associations (kendall's tau-b) with changes in offline exhaled  
 39 nitric oxide concentration after treatment initiation with intermittent or maintenance inhaled corticosteroid in the MIST trial.

| Predictor variable                             | Intermittent inhaled corticosteroid |                                                              | Maintenance inhaled corticosteroid |                                                              |
|------------------------------------------------|-------------------------------------|--------------------------------------------------------------|------------------------------------|--------------------------------------------------------------|
|                                                | Asthma control score <sup>1</sup>   | Correlation with change in exhaled nitric oxide <sup>2</sup> | Asthma control score <sup>1</sup>  | Correlation with change in exhaled nitric oxide <sup>2</sup> |
| Blood eosinophils $\geq 150$ cells/microliter  | 0.28 $\pm$ 0.05                     | -0.117                                                       | 0.17 $\pm$ 0.33                    | -0.388*                                                      |
| Plus any aeroallergen sensitization            | 0.21 $\pm$ 0.04                     | -0.121                                                       | 0.17 $\pm$ 0.05                    | -0.457*                                                      |
| Blood eosinophils $\geq 200$ cells/microliter  | 0.28 $\pm$ 0.05                     | -0.201                                                       | 0.18 $\pm$ 0.04                    | -0.354*                                                      |
| Plus any aeroallergen sensitization            | 0.22 $\pm$ 0.05                     | -0.150                                                       | 0.19 $\pm$ 0.05                    | -0.419*                                                      |
| Blood eosinophils $\geq 250$ cells/microliter  | 0.22 $\pm$ 0.04                     | -0.302                                                       | 0.18 $\pm$ 0.04                    | -0.407*                                                      |
| Plus any aeroallergen sensitization            | 0.18 $\pm$ 0.04                     | -0.232                                                       | 0.16 $\pm$ 0.05                    | -0.450*                                                      |
| Blood eosinophils $\geq 300$ cells/microliter  | 0.22 $\pm$ 0.19                     | -0.272                                                       | 0.19 $\pm$ 0.05                    | -0.352*                                                      |
| Plus any aeroallergen sensitization            | 0.19 $\pm$ 0.04                     | -0.189                                                       | 0.17 $\pm$ 0.05                    | -0.484*                                                      |
| *Blood eosinophils $\geq 350$ cells/microliter | 0.24 $\pm$ 0.05                     | -0.234                                                       | 0.21 $\pm$ 0.04                    | -0.419*                                                      |
| Plus any aeroallergen sensitization            | 0.19 $\pm$ 0.04                     | -0.189                                                       | 0.17 $\pm$ 0.05                    | -0.545*                                                      |

40

41 \*p < 0.05 for correlation coefficient

42 <sup>1</sup> Obtained after treatment initiation, no baseline available. Lower scores reflect better asthma control.

43 <sup>2</sup> Change in exhaled nitric oxide between baseline and after treatment initiation

44 **Figure Legends**

45

46 **Figure E1.** word count = 31

47 (A) Distribution of blood eosinophil counts in all study participants (horizontal line at median)  
48 and (B) association between blood eosinophil counts and blood eosinophil percentages.  
49 CI=confidence interval (shown as dashed line).

50

51 **Figure E2.** word count = 34

52 (A) Distribution of blood eosinophil counts by ethnicity (horizontal line at median), (B) race, (C)  
53 inhaled corticosteroid (ICS) treatment prior to study enrollment and (D) leukotriene receptor  
54 antagonist (LTRA) treatment prior to study enrollment.

55

56 **Figure E3.** word count = 40

57 (A) Associations between blood eosinophil counts and total serum IgE concentrations, (B) the  
58 percentage of positive aeroallergens (of 8 aeroallergens), and (C) the percentage of total positive  
59 allergens (of 11 total aeroallergens and foods). CI=confidence interval (shown as dashed line).

60

61 **Figure E4.** word count = 46

62 Receiver operating curves depicting the sensitivity and specificity of blood eosinophil counts for  
63 prediction of exacerbation occurrence in (A) all participants, (C) participants with sensitization  
64 to any food or aeroallergen, (C) participants with sensitization to food, and (D) participants with  
65 sensitization to any aeroallergen. CI=confidence interval

66

67 **Figure E5.** word count = 37

68 (A) Annualized exacerbation rate (mean  $\pm$  standard error of the mean) and (B) percentage of  
69 children hospitalized for an exacerbation, by blood eosinophil (eos) grouping and food  
70 sensitization variables. \*p < 0.05 vs. cut point not met.

Journal Pre-proof
